# Supplementary material for: Variants in the Mitochondrial Genome Sequence of Rhyzopertha dominica (Fabricius) (Coleoptera: Bostrycidae)
Source: MDPI journal article supplement (doi:10.3390/insects12050387), 2021-04-27

**Figure S3.** Predicted structures of rna from the mitochondrial genome of *Rhyzopertha dominica*. a), *rrnL*;  
b), *rrnS*.

a. Predicted structure of *R. dominica* *rrnL*.

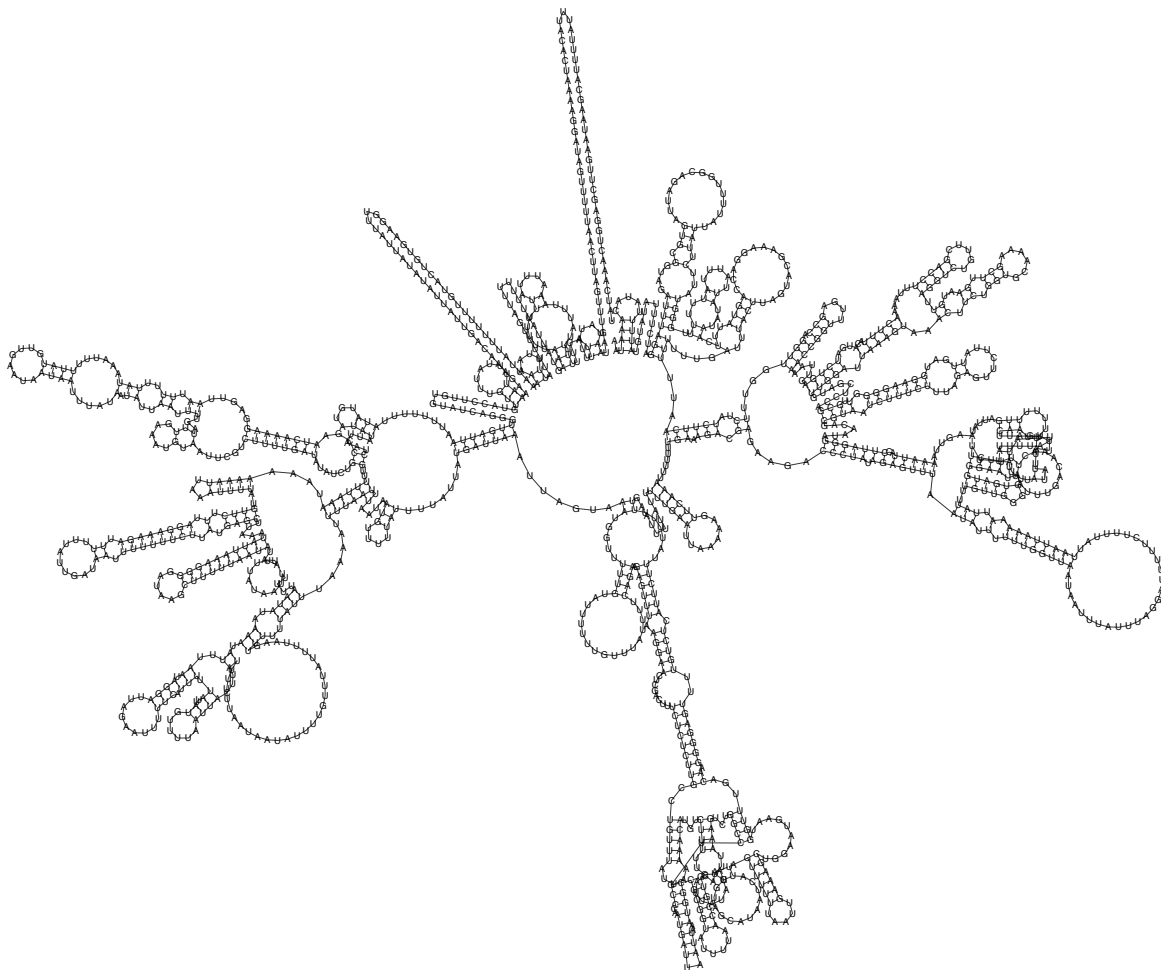

b. Predicted structure of *R. dominica* *rrnS*.

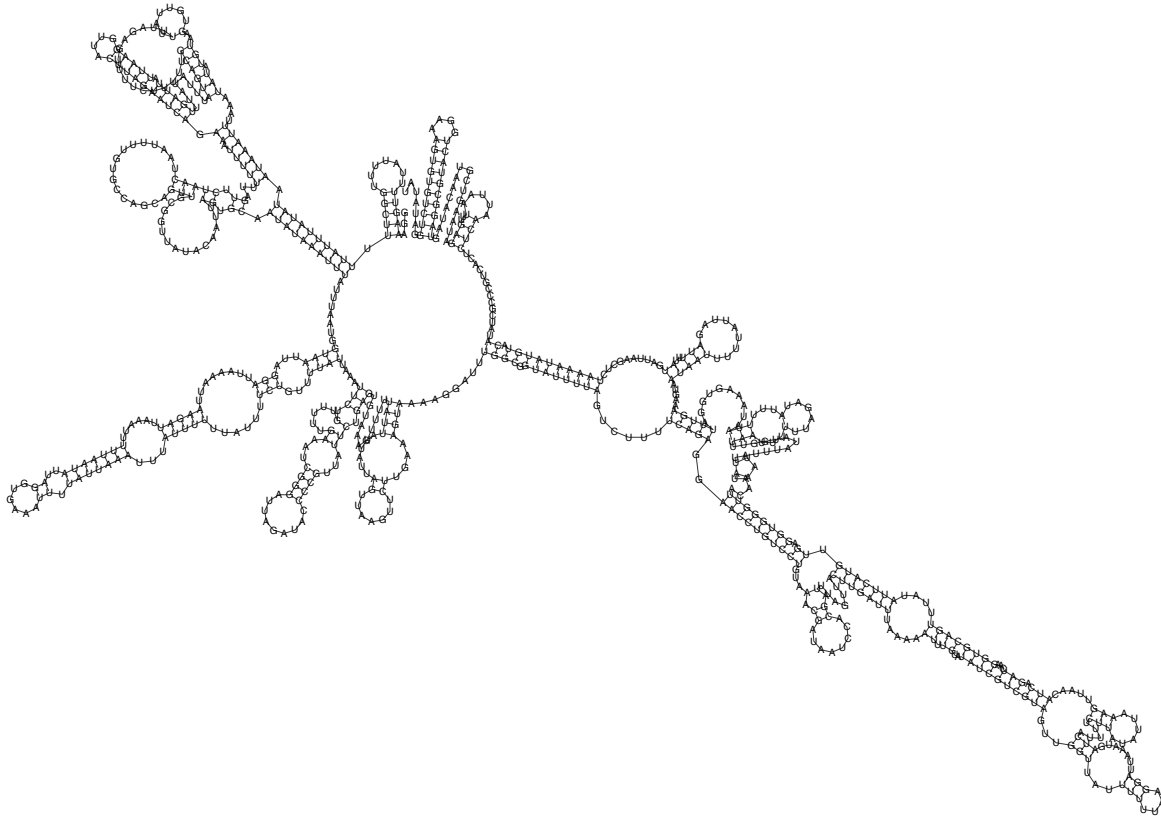

Supplement: s1 [file s1]
