# Supplementary material for: Variants in the Mitochondrial Genome Sequence of Rhyzopertha dominica (Fabricius) (Coleoptera: Bostrycidae)
Source: MDPI journal article supplement (doi:10.3390/insects12050387), 2021-04-27

**Figure S6.** Plot of GC content (%) versus nt in the predicted sequence (accession #MW020612) of the *Rhizopertha dominica* mitochondrial genome.

Plot GC content of DNA sequences

Wed Sep 23 11:40:48 2020

Rdo\_MitoGenome: 15724 bps, window size 25 bps, everage gc 25.30%, t 4761, c 2410, a 6984, g 1568

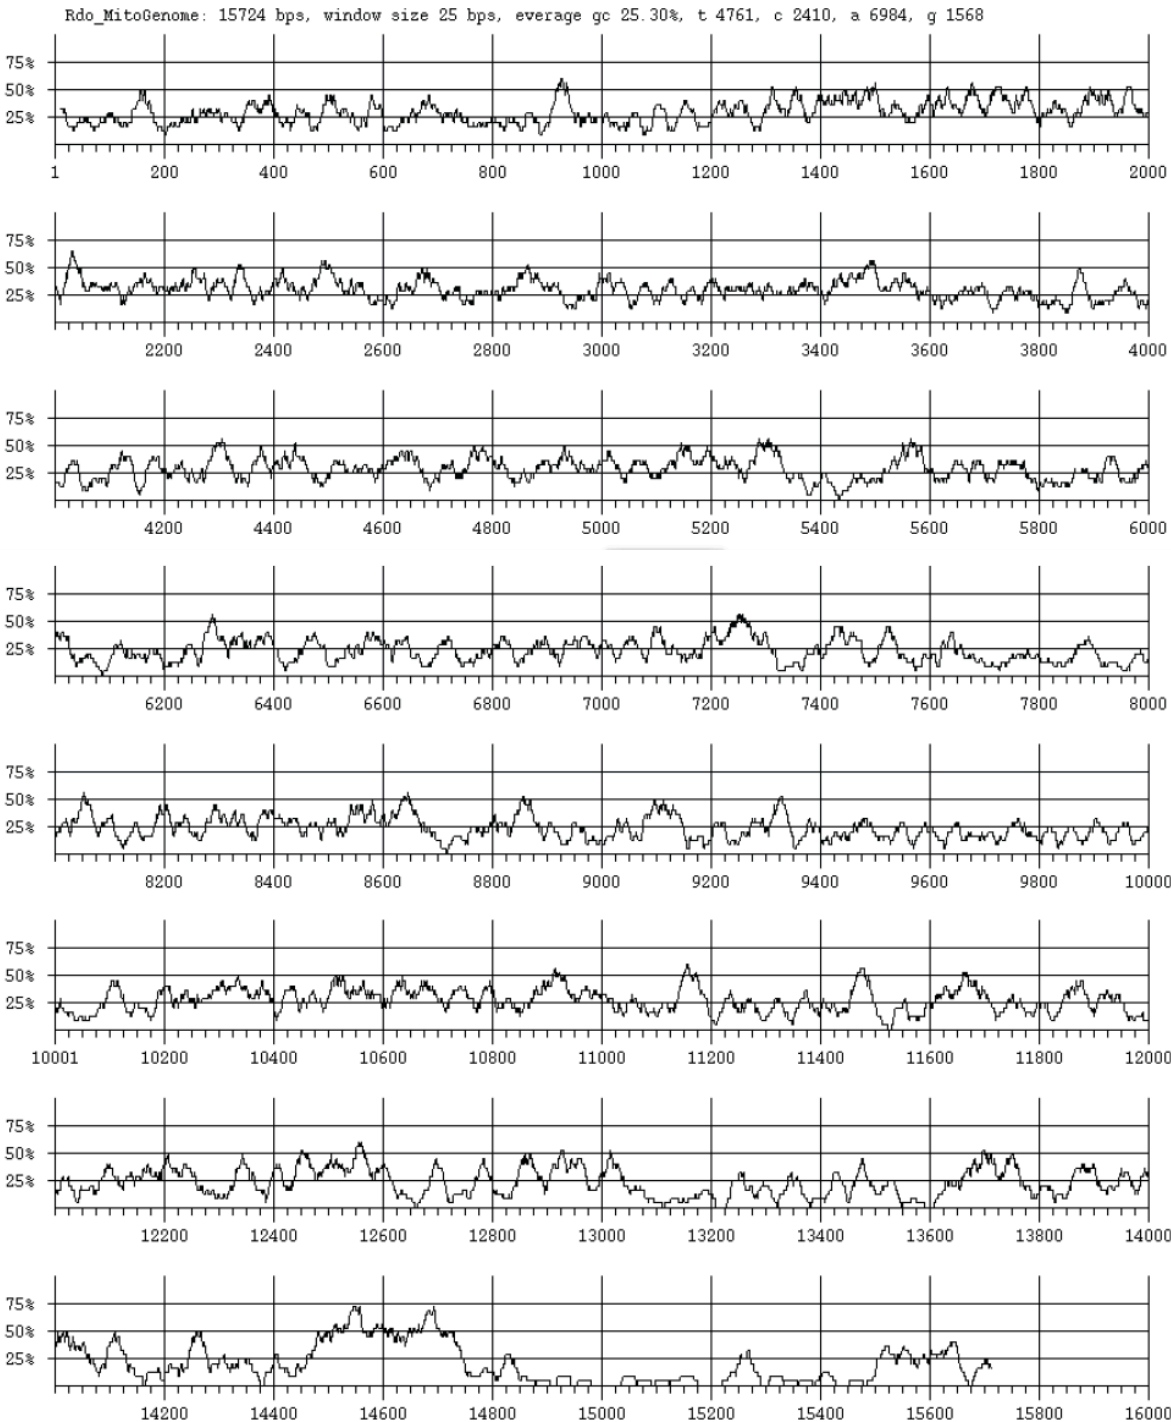

Supplement: s1 [file s1]
