# Supplementary material for: Variants in the Mitochondrial Genome Sequence of Rhyzopertha dominica (Fabricius) (Coleoptera: Bostrycidae)
Source: MDPI journal article supplement (doi:10.3390/insects12050387), 2021-04-27

**Figure S2.** Predicted stem-loop structure for the *trna* genes from the mitochondrial genome of *Rhyzopertha dominica*.



i. trnL1

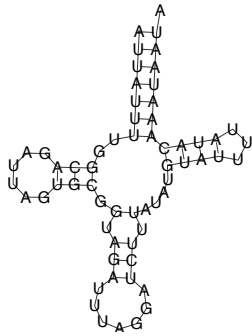

j. trnL2

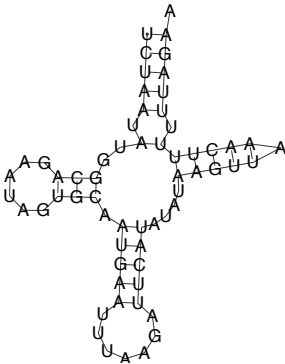

k. trnM

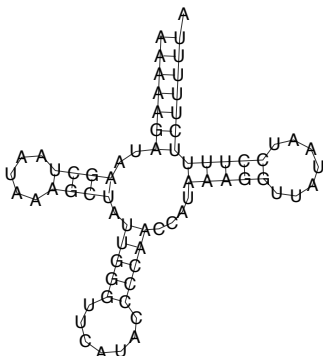

l. trnN

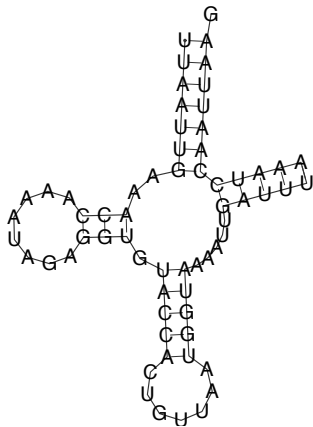

m. trnP

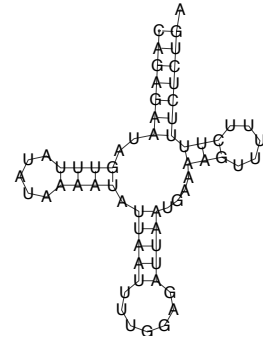

n. trnQ

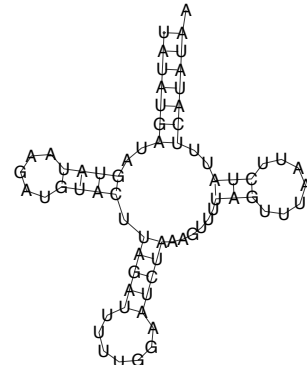

o. trnR

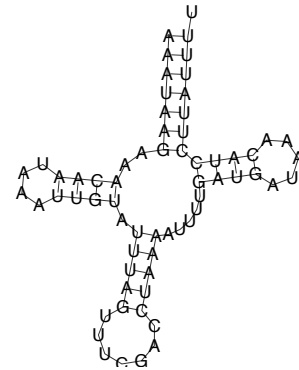

p. trnS1

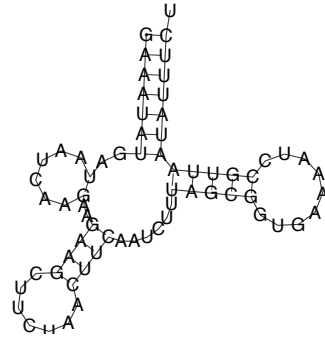

q. trnS2

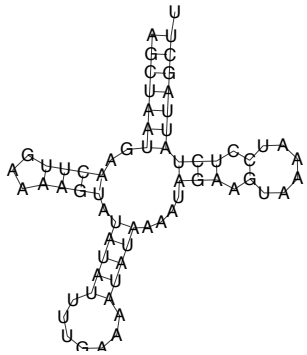

u. trnY

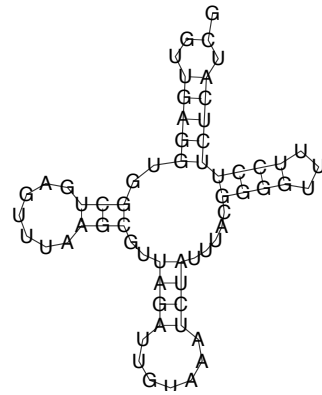

r. trnT

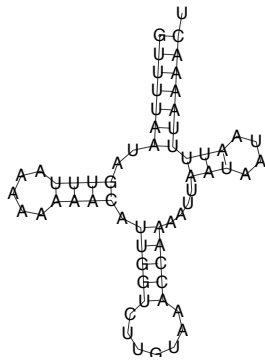

s. trnV

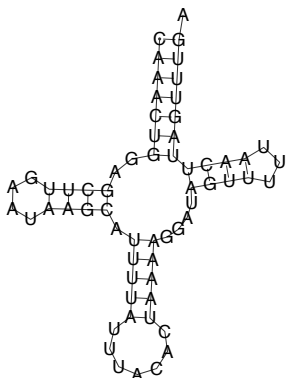

t. trnW

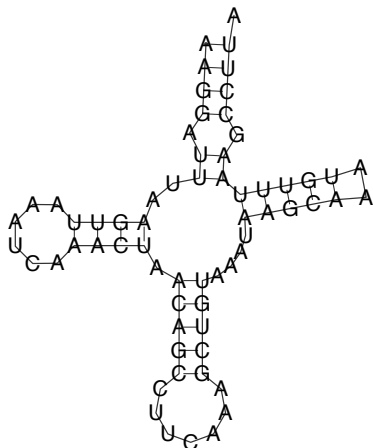

Supplement: s1 [file s1]
