# Supplementary material for: Variants in the Mitochondrial Genome Sequence of Rhyzopertha dominica (Fabricius) (Coleoptera: Bostrycidae)
Source: MDPI journal article supplement (doi:10.3390/insects12050387), 2021-04-27
Supplement: s1 [file s1]

**Figure S4.** Alignment of protein coding sequences of the *Rhizopertha dominica* mitochondrial genome from this paper (top sequence) and that predicted by Ouyang et al. [15] (lower sequence). a), *nad2*; b), *cox1*; c), *cox2*; d), *atp8*; e), *atp6*; f), *cox3*; g), *nad3*; h), *nad5*; i), *nad4*; j), *cytB*; k), *nad1*. Amino acid differences due to SNVs are notated with turquoise shading.

**a. *nad2***

|            |                                                                |  |
|------------|----------------------------------------------------------------|--|
| Seq4       | MIKLSKISFTITMMIGSMITISSYTWGMWVGLEINLLSIPLLTTKKNIYSTEAAIKYF 60  |  |
| QCI56356.1 | MIKLSKISFTITMMIGSMITISSYTWGMWVGLEINLLSIPLLTTKKNIYSTEAAIKYF 60  |  |
|            | *****                                                          |  |
| Seq4       | ITQALSSILLMSILILSTNLINQKSAMMILYSSLMTKMGTAFFHFPEIEGLDWMNC 120   |  |
| QCI56356.1 | ITQALSSILLMSILILSTNLINQKSAMMILYSSLMTKMGTAFFHFPEIEGLDWMNC 120   |  |
|            | *****                                                          |  |
| Seq4       | LIMMTWQKIAPAMILSSMNMTFIYITITSSMLISGIMGVNQTSRLKIMAYSSINHMAW 180 |  |
| QCI56356.1 | LIMMTWQKIAPAMILSSMNMTFIYITITSSMLISGIMGVNQTSRLKIMAYSSINHMAW 180 |  |
|            | *****                                                          |  |
| Seq4       | MMASMNEKIFYIYLSIYITMSSIFITLKSNNSLYIYQMNTSNQSPIIKKTFIINLLSM 240 |  |
| QCI56356.1 | MMASMNEKIFYIYLSIYITMSSIFITLKSNNSLYIYQMNTSNQSPIIKKTFIINLLSM 240 |  |
|            | *****                                                          |  |
| Seq4       | GGLPPLLGGFFPKWMVINSMIQSNLILSTFMVMTLLTLYFYMQISMPILTMKMKMKWS 300 |  |
| QCI56356.1 | GGLPPLLGGFFPKWMVINSMIQSNLILSTFMVMTLLTLYFYMQISMPILTMKMKMKWS 300 |  |
|            | *****                                                          |  |
| Seq4       | KKNPQQFFMNKMNMINLLSIPVCTIWFNFY 330                             |  |
| QCI56356.1 | KKNPQQFFMNKMNMINLLSIPVCTIWFNFY 330                             |  |
|            | *****                                                          |  |

**b. *cox1***

|                |                                                               |     |
|----------------|---------------------------------------------------------------|-----|
| Seq8           | NKWLYSTNHKDIGTLYFIFGIWSGMVGTALESMLIRSELGNPGALIGDDQIYNVIVTAHAF | 36  |
| YP_009655010.1 | NKWLYSTNHKDIGTLYFIFGIWSGMVGTALESMLIRSELGNPGALIGDDQIYNVIVTAHAF | 60  |
|                | *****                                                         |     |
| Seq8           | IMIFFVMVPMIMIGGFGNWLVPLMIGAPDMAFFRMNNSFWLLPPLTLTLLTSSIVETGAG  | 96  |
| YP_009655010.1 | IMIFFVMVPMIMIGGFGNWLVPLMIGAPDMAFFRMNNSFWLLPPLTLTLLTSSIVETGAG  | 120 |
|                | *****                                                         |     |
| Seq8           | TGWTVPPLSNNTAHSGASVDLAIFSLHLAGISSILGAVNFITTIINMRPKGMPERIPPL   | 156 |
| YP_009655010.1 | TGWTVPPLSNNTAHSGASVDLAIFSLHLAGISSILGAVNFITTIINMRPKGMPERIPPL   | 180 |
|                | *****                                                         |     |
| Seq8           | FVWSVGITALLLLSLPVLAGAITMLLTDRNLNTSFFDPAGGGDPILYQHLFWFFGHPEV   | 216 |
| YP_009655010.1 | FVWSVGITALLLLSLPVLAGAITMLLTDRNLNTSFFDPAGGGDPILYQHLFWFFGHPEV   | 240 |
|                | *****                                                         |     |
| Seq8           | YILILPGFGMISHIISHESGKKETFGSLGMIYAMMAIGLLGFIVWAHMFVGMVDVTRA    | 276 |
| YP_009655010.1 | YILILPGFGMISHIISHESGKKETFGSLGMIYAMMAIGLLGFIVWAHMFVGMVDVTRA    | 300 |
|                | *****                                                         |     |
| Seq8           | YFTSATMIIAVPTGIKVFVSWLATLHGTQMNYSPPMMWSLGFVFLFTVGGLTGVVLANSI  | 336 |
| YP_009655010.1 | YFTSATMIIAVPTGIKVFVSWLATLHGTQMNYSPPMMWSLGFVFLFTVGGLTGVVLANSI  | 360 |
|                | *****                                                         |     |
| Seq8           | DIILHDTYYVVAHFHYVLSMGAVFAIMAGIIQWFPPLFTGLTLNEKMLKIQFLIMFMGVNI | 396 |
| YP_009655010.1 | DIILHDTYYVVAHFHYVLSMGAVFAIMAGIIQWFPPLFTGLTLNEKMLKIQFLIMFMGVNI | 420 |
|                | *****                                                         |     |
| Seq8           | TFFPQHFLGLSGMPRRYSYDPAYLTWNIISISGSMSTVSIIFMSFIMWESLSSKRKNI    | 456 |
| YP_009655010.1 | TFFPQHFLGLSGMPRRYSYDPAYLTWNIISISGSMSTVSIIFMSFIMWESLSSKRKNI    | 480 |
|                | *****                                                         |     |
| Seq8           | SNNQLSSAIEWLQNSPPEEHSYSELPILAKF 487                           |     |
| YP_009655010.1 | SNNQLSSAIEWLQNSPPEEHSYSELPILAK- 510                           |     |
|                | *****                                                         |     |

**c. *cox2***

|                |                                                             |     |
|----------------|-------------------------------------------------------------|-----|
| Seq10          | MATWKMTSMSNSNSPAMEQLTFFHDTMTVLIMITILVGylMSTLFTNKLTYRFLLEGQT | 60  |
| YP_009655011.1 | MATWKMTSMSNSNSPAMEQLTFFHDTMTVLIMITILVGylMSTLFTNKLTYRFLLEGQT | 60  |
| *****          |                                                             |     |
| Seq10          | IEMIWTILPAITLIFIALPSLQILYTLDEIINPSMSVKSIGHQWWSYEYSDFKKTEFDS | 120 |
| YP_009655011.1 | IEMIWTILPAITLIFIALPSLQILYTLDEIINPSMSVKSIGHQWWSYEYSDFKKTEFDS | 120 |
| *****          |                                                             |     |
| Seq10          | YMKSPNEIKNQEFRLDVDNRMTLPMKTKIRLLVSSTDVIHSWTIPSLGVKIDATPGRLN | 180 |
| YP_009655011.1 | YMKSPNEIKNQEFRLDVDNRMTLPMKTKIRLLVSSTDVIHSWTIPSLGVKIDATPGRLN | 180 |
| *****          |                                                             |     |
| Seq10          | QASMFIIINPGLMYGQCSEICGANHSFMPIVVESITPNKFIEWIKNS 229         |     |
| YP_009655011.1 | QASMFIIINPGLMYGQCSEICGANHSFMPIVVESITPNKFIEWIKN- 225         |     |
| *****          |                                                             |     |

**d. *atp8***

|                |                                                    |    |
|----------------|----------------------------------------------------|----|
| Seq13          | ---MSPLNWMTLFIFFTITLVMSTMNFYNYKPEPLKGEKTISMSKKNWKW | 48 |
| YP_009655012.1 | MPQMSPLNWMTLFIFFTITLVMSTMNFYNYKPEPLKGEKTISMSKKNWKW | 51 |
| *****          |                                                    |    |

**e. *atp6***

|                |                                                              |     |
|----------------|--------------------------------------------------------------|-----|
| Seq14          | MMSNLFSSFDpstQILSLNWLSSLIILMIMPMNFWLIPSRMSLLWMKISKKLHNEFKILI | 60  |
| YP_009655013.1 | MMSNLFSSFDpstQILSLNWLSSLIILMIMPMNFWLIPSRMSLLWMKISKKLHNEFKILI | 60  |
| *****          |                                                              |     |
| Seq14          | GKNNGSSLMFTSLLLLIMINNFMGLFPYIFTSTSHLTMTLTALPLWTSFMIYGWFNNTI  | 120 |
| YP_009655013.1 | GKNNGSSLMFTSLLLLIMINNFMGLFPYIFTSTSHLTMTLTALPLWTSFMIYGWFNNTI  | 120 |
| *****          |                                                              |     |
| Seq14          | SMLAHLVPQGTppILMPFMVCIETISNIIRPGTLAIRLTANMIAGHLLLTLLGNTGAGIS | 180 |
| YP_009655013.1 | SMLAHLVPQGTppILMPFMVCIETISNIIRPGALAIRLTANMIAGHLLLTLLGNTGAGIS | 180 |
| *****          |                                                              |     |
| Seq14          | SILVSILILTQILLLVLESavaIIQSYVFAILSTLYSSEVN 221                |     |
| YP_009655013.1 | SILVSILILTQILLLVLESavaIIQSYVFAILSTLYSSEVN 221                |     |
| *****          |                                                              |     |

**f. *cox3***

|                |                                                               |     |
|----------------|---------------------------------------------------------------|-----|
| Seq15          | MTKKNHPPHFLVDVSPWPILGALSAMSTMVGLIKWFHMYQVNLFLVGLLSTSLIMYQWWRD | 60  |
| YP_009655014.1 | MTKKNHPPHFLVDVSPWPILGALSAMSTMVGLIKWFHMYQVNLFLVGLLSTSLIMYQWWRD | 60  |
| *****          |                                                               |     |
| Seq15          | ITREGSFQGHHTFIVTMGLRWGMILFITSEVFFFISFFWGFHSSLSPSIEIGMNWPPLG   | 120 |
| YP_009655014.1 | ITREGSFQGHHTFIVTMGLRWGMILFITSEVFFFISFFWGFHSSLSPSIEIGMNWPPLG   | 120 |
| *****          |                                                               |     |
| Seq15          | ILTFNPLSIPLLNTLILLTSGLTVTWAHHSIMENNWKQANQGLTLTIILGLYFTILQAYE  | 180 |
| YP_009655014.1 | ILTFNPLSIPLLNTLILLTSGLTVTWAHHSIMENNWKQANQGLTLTIILGLYFTILQAYE  | 180 |
| *****          |                                                               |     |
| Seq15          | YIEAPFTISDSVYGSSFFMATGFHGLHVIIGTTFLSVCLLRHLMNHFSMIHHFGFEAAAW  | 240 |
| YP_009655014.1 | YIEAPFTISDSVYGSSFFMATGFHGLHVIIGTTFLSVCLLRHLMNHFSMIHHFGFEAAAW  | 240 |
| *****          |                                                               |     |
| Seq15          | YWHFVDVVWLFlyLSIYWwGK 280                                     |     |
| YP_009655014.1 | YWHFVDVVWLFlyLSIYWwGS 261                                     |     |
| *****          |                                                               |     |

**g. nad3**

|                |                                                              |     |
|----------------|--------------------------------------------------------------|-----|
| Seq17          | MKIILISSMIIFSISLILMMMNQVISKKTFKDREKMSPYECGFDPKSHARIPLSIRFFLI | 60  |
| YP_009655015.1 | MKIILISSMIIFSISLILMMMNQVISKKTFKDREKMSPYECGFDPKSHARIPLSIRFFLI | 60  |
|                | *****                                                        |     |
| Seq17          | TMIFLIFDVEITLLLPAINNLTNNPLEFLITFIFFISILTGTIHEWKQGALNWK       | 117 |
| YP_009655015.1 | TVIFLIFDVEITLLLPAINNLTNNPLEFLITFIFFISILTGTIHEWKQGALNWK       | 117 |
|                | *.*****                                                      |     |

**h. nad5**

|                |                                                               |     |
|----------------|---------------------------------------------------------------|-----|
| Seq24          | MSLTFVFFSLFLFCSEFFFFFLSLYFMILDFSLFVEYELFSLNSSLINFSLYFDFMSLIFM | 60  |
| YP_009655016.1 | MSLTFVFFSLFLFCSEFFFFFLSLYFMILDFSLFVEYELFSLNSSLINFSLYFDFMSLIFM | 60  |
|                | *****                                                         |     |
| Seq24          | SFVFFISSMVVFYSEDYMHGDLMLNRFILLVVLVFLSMMMILSPNIISILLGWDGLGLV   | 120 |
| YP_009655016.1 | SFVFFISSMVVFYSEDYMHGDLMLNRFILLVVLVFLSMMMILSPNIISILLGWDGLGLV   | 120 |
|                | *****                                                         |     |
| Seq24          | SYSLVIYYQNFKSFSAGMLTALSNRIGDVALLMISIAWMLNYGSWNYLFYVFFIDNLYFI  | 180 |
| YP_009655016.1 | SYSLVIYYQNFKSFSAGMLTALSNRIGDVALLMISIAWMLNYGSWNYLFYVFFIDNLYFI  | 180 |
|                | *****                                                         |     |
| Seq24          | ISLFIMLAFTKSAQIPFSAWLPAAMAAPTVPSSLVHSSTLVTAGVYLMIRFSYCFCDKV   | 240 |
| YP_009655016.1 | ISLFIMLAFTKSAQIPFSAWLPAAMAAPTVPSSLVHSSTLVTAGVYLMIRFSYCFCDKV   | 240 |
|                | *****                                                         |     |
| Seq24          | LILGLLLSCLTMFMAGLGANFEFDLKKIIALSTLSQLGLMMSILFSGGEYLAFFHLLSHA  | 300 |
| YP_009655016.1 | LILGLLLSCLTMFMAGLGANFEFDLKKIIALSTLSQLGLMMSILFSGGEYLAFFHLLSHA  | 300 |
|                | *****                                                         |     |
| Seq24          | LFKALLFMCAGSFIHSFMNFQDIRFMGSALNFMPLTSCFFIICNFSLCGLPFLSGFYSKD  | 360 |
| YP_009655016.1 | LFKALLFMCAGSFIHSFMNFQDIRFMGSALNFMPLTSCFFIICNFSLCGLPFLSGFYSKD  | 360 |
|                | *****                                                         |     |
| Seq24          | LILEFYSMKFVNMFSYILFFVSTGLTVSYTVRLMYLFFGYLNFSPLFLISEGGNFMLFG   | 420 |
| YP_009655016.1 | LILEFYSMKFVNMFSYILFFVSTGLTVSYTVRLMYLFFGYLNFSPLFLISEGGNFMLFG   | 420 |
|                | ** *****                                                      |     |
| Seq24          | MLGLIFPVIVAGSVLSWLMFSTPYIICLPLYMKFMTLFVIFSGLLIGVEVSRFSLNYHSK  | 480 |
| YP_009655016.1 | MLGLIFPVIVAGSVLSWLMFSTPYIICLPLYMKFMTLFVIFSGLLIGVEVSRFSLNYHSK  | 480 |
|                | *****                                                         |     |
| Seq24          | SLNFMNFSWFSSLMWGLPLISSLGMSIFPLTLGRLFISSFDQGWLEHLGAQGFMNLIK    | 540 |
| YP_009655016.1 | SLNFMNFSWFSSLMWGLPLISSLGMSIFPLTLGRLFISSFDQGWLEHLGAQGFMNLIK    | 540 |
|                | *****                                                         |     |
| Seq24          | TRSLHLIFSNQLKLFLIMLIFWVSFLILFYLNSL                            | 577 |
| YP_009655016.1 | TRSLHLIFSNQLKLFLIMLIFWVSFLILF-----                            | 569 |
|                | *****                                                         |     |

**i. nad4**

|                |                                                               |     |
|----------------|---------------------------------------------------------------|-----|
| Seq26          | MMKFILFVFFMIPLSFLDFYLVFLFLGLMMFIFLKIAPVSTILLGLGFGCDLFSGPLILL  | 60  |
| YP_009655017.1 | MMKFILFVFFMIPLSFLDFYLVFLFLGLMMFIFLKIAPVSTILLGLGFGCDLFSGPLILL  | 60  |
|                | *****                                                         |     |
| Seq26          | SFFICLLMFIASSKIYMDNNFHFYFSLNVIMLLFFLICAFSSLNFLFYVFFESSLIPTL   | 120 |
| YP_009655017.1 | SFFICLLMFIASSKIYMDNNFHFYFSLNVIMLLFFLICAFSSLNFLFYVFFESSLIPTL   | 120 |
|                | *****                                                         |     |
| Seq26          | FLILGWGYQPERIQAGFYLLFYTLFASLPMFLGLMHYYLSFGSLSMFLMFQVNSMIFNFM  | 180 |
| YP_009655017.1 | FLILGWGYQPERIQAGFYLLFYTLFASLPMFLGLMHYYLSFGSLSMFLMFQVNSMIFNFM  | 180 |
|                | *****                                                         |     |
| Seq26          | MIFVFLVKIPMFVVLWLPAKAVEAPVSGSMILAGVMLKLGGYGLLRVFLPKAEVSFFS    | 240 |
| YP_009655017.1 | MIFVFLVKIPMFVVLWLPAKAVEAPVSGSMILAGVMLKLGGYGLLRVFLPKAEVSFFS    | 240 |
|                | *****                                                         |     |
| Seq26          | TFFVSIISVFGGLIVSLICLRQSDIKSLIAYSSVAHMSMVISGCFTLTTWGVIGSLIMMIS | 300 |
| YP_009655017.1 | TFFVSIISVFGGLIVSLICLRQSDIKSLIAYSSVAHMSMVISGCFTLTTWGVIGSLIMMIS | 300 |
|                | *****                                                         |     |
| Seq26          | HGICSSGLFCLANITYERSLSRSLYLNKGYINILPNLSLWWFLLCSSNMAAPPSSLNVSE  | 360 |
| YP_009655017.1 | HGICSSGLFCLANITYERSLSRSLYLNKGYINILPNLSLWWFLLCSSNMAAPPSSLNVSE  | 360 |
|                | *****                                                         |     |
| Seq26          | ILILSSLVSWSSLMILILSFLSFLSAAYSFLYSFTQHGMVSSGLFSFWSVNVREYLLLF   | 420 |
| YP_009655017.1 | ILILSSLVSWSSLMILILSFLSFLSAAYSFLYSFTQHGMVSSGLFSFWSVNVREYLLLF   | 420 |
|                | *****                                                         |     |
| Seq26          | FHWIPLNLIFLFMDNLFSL                                           | 451 |
| YP_009655017.1 | CHWIPLNLIFLFMHNLFSL                                           | 439 |
|                | *****.                                                        |     |

**j. cytB**

|                |                                                               |     |
|----------------|---------------------------------------------------------------|-----|
| Seq31          | MKKQLMKISPVTKIINNALIDLPTPSNISIWWMGSILGLCLIIQIITGMFLTMHYTPNT   | 60  |
| YP_009655020.1 | MKKQLMKISPVTKIINNALIDLPTPSNISIWWMGSILGLCLIIQIITGLFLTMHYTPNT   | 60  |
|                | *****.                                                        |     |
| Seq31          | EMAFNSVVHICRDVNYGWMIRTIHANGASMEFFICIYMHIGRGLYYGSYKLIHTWMVGVII | 120 |
| YP_009655020.1 | EMAFNSVVHICRDVNYGWMIRTIHANGASMEFFICIYMHIGRGLYYGSYKLIHTWMVGVII | 120 |
|                | *****                                                         |     |
| Seq31          | LFLVMATAFLGYVLPWGQMSFWGATVITNLLSAIPYVGKMIVEWLWGGFAVDNATLNRFF  | 180 |
| YP_009655020.1 | LFLVMATAFLGYVLPWGQMSFWGATVITNLLSAIPYVGKMIVEWLWGGFAVDNATLNRFF  | 180 |
|                | ***.*****                                                     |     |
| Seq31          | AFHFLLPFIVSAMVMIHLLFLHQTGSNPLGTNSNIDKIPFHPYFSTKDMGFIIVTMML    | 240 |
| YP_009655020.1 | AFHFLLPFIVSAMVMIHLLFLHQTGSNPLGTNSNIDKIPFHPYFSTKDMGFIIVTMML    | 240 |
|                | *****.                                                        |     |
| Seq31          | MTISLWNPYLLGDPDNFIPANPLVTPVHIQPEWYFLFAYAILRSIPNKLGGVIALIMSIA  | 300 |
| YP_009655020.1 | MTISLWNPYLLGDPDNFIPANPLVTPVHIQPEWYFLFAYAILRSIPNKLGGVIALIMSIA  | 300 |
|                | *****                                                         |     |
| Seq31          | ILFIIPLTNKSKFQSMNFYPMNKFLFWSMVSTVILLTWIGARPVQDPYITTGQVLTIIYF  | 360 |
| YP_009655020.1 | ILFIIPLTNKSKFQSMNFYPMNKFLFWSMVSTVILLTWIGARPVQDPYITTGQVLTIIYF  | 360 |
|                | *****.                                                        |     |
| Seq31          | LYYMITPLTLKIWDKILIK                                           | 379 |
| YP_009655020.1 | LYYMITPLTLKIWDKILIK                                           | 379 |
|                | *****                                                         |     |

***k. nad1***

|                |                                                               |     |
|----------------|---------------------------------------------------------------|-----|
| Seq33          | MFIFDFILVFFSLLVLIIGVLVGVAFLTLMERKVLGYIQLRKGPKNKVGFMGLLQPFSDA  | 60  |
| YP_009655021.1 | -MFIFDFILVFFSLLVLIIGVLVGVAFLTLMERKVLGYIQLRKGPKNKVGFMGLLQPFSDA | 59  |
|                | :*****                                                        |     |
| Seq33          | IKLFSKEQCLPLVSNYVFYYFSPVMNFFISLMMWLSFPFFSYFLSFNLGMLFFLCFSSLS  | 120 |
| YP_009655021.1 | IKLFSKEQCLPLVSNYVFYYFSPVMNFFISLMMWLSFPFFSYFLSFNLGMLFFLCFSSLS  | 119 |
|                | *****                                                         |     |
| Seq33          | VYAVMISGWSSNSNYSMIGSLRSMAQTISYEVSLVIIISFLVMTSSLCFYDFFKYQKYL   | 180 |
| YP_009655021.1 | VYAVMISGWSSNSNYSMIGSLRSMAQTISYEVSLVIIISFLVMTSSLCFYDFFKYQKYL   | 179 |
|                | *****                                                         |     |
| Seq33          | WFVFLMFPLSLILFVSMLAETNRTPFDFAEGESELVSGFNVEYSSGGFALIFLAEYSSIL  | 240 |
| YP_009655021.1 | WFVFLMFPLSLILFVSMLAETNRTPFDFAEGESELVSGFNVEYSSGGFALIFLAEYSSIL  | 239 |
|                | *****                                                         |     |
| Seq33          | FMSMICSLMFFGGDYMNLFYFFIKIVFFSFLWVWVRGTLPRYRYDKLMYLAWKIYLPVSLC | 300 |
| YP_009655021.1 | FMSMICSLMFFGGDLYKFIFFFIKIVFFSFLWVWVRGTLPRYRYDKLMYLAWKIYLPVSLC | 299 |
|                | ***** : : *****                                               |     |
| Seq33          | FLLFYLGKTLWCWFII 317                                          |     |
| YP_009655021.1 | FLLFYLGKTLWCWFII 316                                          |     |
|                | *****                                                         |     |
